# Supplementary material
Source: publisher figshare collection journal article supplement (https://acs.figshare.com/ndownloader/files/17082413)
Supplement: Supplementary file 1 [file 17082413]

# Supplementary Information

## Visualization of Lung Inflammation to Pulmonary Fibrosis via Peroxynitrite Fluctuation

Zixuan Zhan<sup>†</sup>, Rui Liu<sup>†</sup>, Li Chai, § Yongcheng Dai<sup>†</sup> and Yi Lv<sup>†\*\*</sup>

<sup>†</sup>Key Laboratory of Green Chemistry & Technology, Ministry of Education, College of Chemistry, Sichuan University, Chengdu, Sichuan 610064, China

<sup>\*</sup>Analytical & Testing Center, Sichuan University, Chengdu, Sichuan 610064, China

<sup>§</sup>Core Facility of West China Hospital, Sichuan University, Chengdu, Sichuan, 610041, China

E-mail: lvy@scu.edu.cn; Tel & Fax: +86 28 85412798

### Content

- 1.General Experimental Section
- 2.Synthesis and Characterization of Compounds
- 3.Scheme S1. Synthesis of **rTPONOO-1** and **rTPONOO-2**
- 3.Figure S1 <sup>1</sup>HNMR, <sup>13</sup>CNMR and HRMS of compounds
- 4.Figure S2 HOMO and LUMO energy level of **rTPONOO-1** and **rTPONOO-2**
- 5.Figure S3 The absorption spectra of **rTPONOO-1** and **rTPONOO-2** toward ONOO<sup>-</sup>
- 6.Figure S4 The pH effect of **rTPONOO-1** and **rTPONOO-2** toward ONOO<sup>-</sup>
- 7.Figure S5 Time-dependent of **rTPONOO-1** and **rTPONOO-2** toward ONOO<sup>-</sup>
- 8.Figure S6 The fluorescence of **rTPONOO-1** toward cations
- 9.Figure S7 The ESI-MS spectra of **rTPONOO-1** toward ONOO<sup>-</sup>
- 10.Figure S8 The NMR titration analysis of **rTPONOO-1** toward ONOO<sup>-</sup>
- 11.Figure S9 The fluorescence ratio (*I*<sub>535</sub>/*I*<sub>718</sub>) of **rTPONOO-1** toward ONOO<sup>-</sup>
- 12.Figure S10 MTT assay of **rTPONOO-1**
- 13.Figure S11 Flow cytometry detecting ONOO<sup>-</sup> by **rTPONOO-1** in A549 cells
- 14.Figure S12 Flow cytometry detecting ONOO<sup>-</sup> by **rTPONOO-1** in RAW 264.7 cells
- 15.Figure S13 Imaging of ONOO<sup>-</sup> in lung slice with **rTPONOO-1**
- 16.Figure S14 Two-photon Z-scan imaging of ONOO<sup>-</sup> in lung slice with **rTPONOO-1**

### 1.General Experimental Section

## Materials and Instrumentations

$^1\text{H}$  NMR,  $^{13}\text{C}$  NMR spectra were measured on a Bruker AM400 NMR spectrometer. Proton Chemical shifts of NMR spectra were given in ppm relative to internal reference TMS (1H, 0.00 ppm). ESI-MS and HRMS spectral data were recorded on a Finnigan LCQ<sup>DECA</sup> and a Bruker Daltonics Bio TOF mass spectrometer, respectively. Photoluminescence spectra were performed on a Hitachi F-7000 fluorescence spectrophotometer. Unless otherwise noted, materials were obtained from commercial suppliers and were used without further purification. Cells and tissue imaging was performed with a Nikon Ni-E multiphoton laser scanning confocal microscope and flow cytometry experiment was performed in BD FACSAria SORP.

## Preparation of Solutions of Cations and Anions

1 mmol of inorganic salt (NaCl, KCl,  $\text{CaCl}_2 \cdot 2\text{H}_2\text{O}$ ,  $\text{ZnCl}_2$ ,  $\text{MgCl}_2 \cdot 6\text{H}_2\text{O}$ ,  $\text{FeCl}_2$ ,  $\text{FeCl}_3 \cdot 6\text{H}_2\text{O}$ ,  $\text{AlCl}_3 \cdot 6\text{H}_2\text{O}$ , glutathione (GSH), cysteine (Cys) were dissolved in distilled water (100 mL) to afford  $1 \times 10^{-2}$  mol/L aqueous solution. The stock solutions were diluted to desired concentrations with water when needed.

## Preparation of Reactive Oxygen Species (ROS) and Reactive Nitrogen Species (RNS)

Hypochlorite was prepared by dilution of commercial NaClO solution in deionized water and assayed using a spectrophotometer using  $\epsilon_{292\text{nm}} = 350 \text{ M}^{-1}\text{cm}^{-1}$ .

*Tert*-butyl hydroperoxide (TBHP) was prepared by dilution of commercial TBHP solution.

Hydrogen peroxide was prepared by dilution of commercial  $\text{H}_2\text{O}_2$  solution directly.

Nitric oxide (NO) was prepared by using  $\text{Na}_2\text{Fe}(\text{CN})_5\text{NO} \cdot 2\text{H}_2\text{O}$

Peroxynitrite stock ( $\text{ONOO}^-$ ) was prepared by following literature procedure<sup>1</sup> and the concentration of peroxynitrite was estimated by using a spectrophotometer  $\epsilon_{302\text{nm}} = 1670 \text{ M}^{-1}\text{cm}^{-1}$ .

Hydroxy radical was prepared by addition of  $\text{Fe}^{2+}$  solution into a solution containing excess  $\text{H}_2\text{O}_2$  through Fenton chemistry.

Superoxide was generated from  $\text{KO}_2$  with a saturated solution of  $\text{KO}_2$  in DMSO.

## Fluorescence Analysis

Probe was dissolved in dimethylformamide (DMF) for a stock solution (500  $\mu\text{M}$ ). The final test solution of **rTPONOO-1** and **rTPONOO-2** ( $5 \times 10^{-6}$  mol/L) was prepared in PBS solution (containing 1% DMF, 50 mM PBS, pH 7.4). The resulting solutions were shaken well at room temperature before recording spectra.

## Cell Cytotoxicity Assay

The cytotoxicity was evaluated by MTT assay. A549 cells and RAW 264.7 cells were cultured in Dulbecco's modified Eagle's medium (DMEM) containing 10% fetal bovine serum and 1% penicillin-streptomycin at  $37^\circ\text{C}$  in 96-well microplates at  $37^\circ\text{C}$  under 5%  $\text{CO}_2$  for 24 h. The medium was next replaced by fresh medium containing various concentrations of **rTOPNOO-1** (0–20  $\mu\text{M}$ ) for 12 h. Each concentration was tested in six replicates. Afterwards, cells were washed twice with PBS and incubated with 0.5 mg/mL MTT reagent for 2 h at  $37^\circ\text{C}$  and then 150  $\mu\text{L}$  of DMSO was added to dissolve formazan. Finally, the absorbance at 490 nm was measured by multidetection microplate reader.

## Cell Culture and Imaging.

A549 cells and RAW 264.7 cells were cultured in Dulbecco's modified Eagle medium (DMEM)

containing 10% fetal bovine serum and 1% penicillin-streptomycin at 37°C in a 5% CO<sub>2</sub>/95% air incubator. For detection of exogenous ONOO<sup>-</sup>, the cultured cells in a 6-well plate were washed three times with PBS and then incubated with 10 µM of **rTPONOO-1** for 30 min at 37 °C in a 5% CO<sub>2</sub>/95% air incubator. After washing twice with PBS, the cells were cultured for another 30 min with different concentrations of ONOO<sup>-</sup>. The cells were washed twice carefully with PBS and imaged. For detection of endogenous ONOO<sup>-</sup>, RAW 264.7 cells in a 6-well plate were stimulated by LPS (1 µg/mL) and IFN-γ (50 ng/mL) for 12 h and then treated with **rTPONOO-1** for another 0.5 h in PBS. The cells were washed three times carefully with PBS and imaged.

### Flow Cytometry Experiments

Cells were treated as described in Cell culture and imaging part. Before measurement by flow cytometry, cells were scraped off gently and collected into a clean 2 mL centrifuge tube. Then, cells were spun down (500 rpm, room temperature, 3 min). After discarding the supernatant, 1 mL of warm PBS was added gently to re-suspend the cell pellet. Finally, cells were analyzed on a BD flow cytometer equipped with 405 nm and 488 nm Ar laser and fluorescence was collected by 525/50 and 695/40 channel.

## 2.Synthesis and Characterization of Compounds

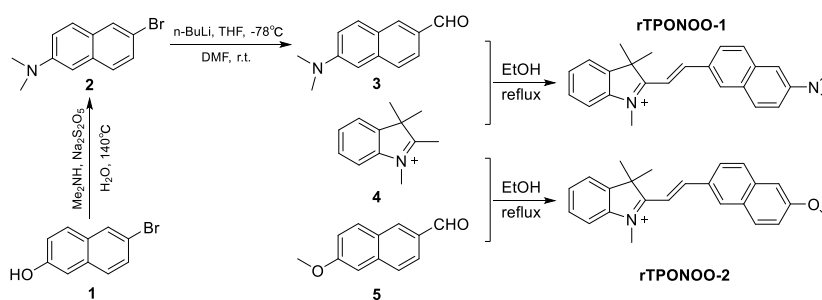

**Scheme S1. Synthesis of rTPONOO-1 and rTPONOO-2**

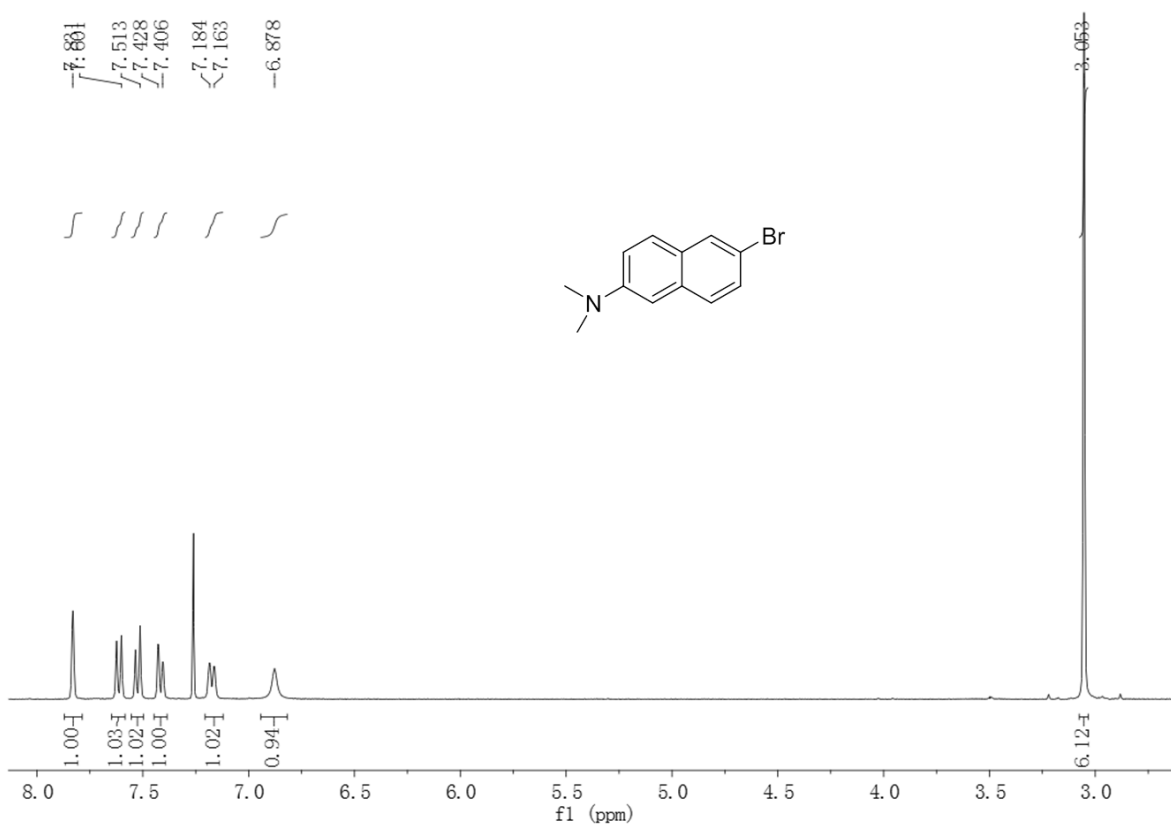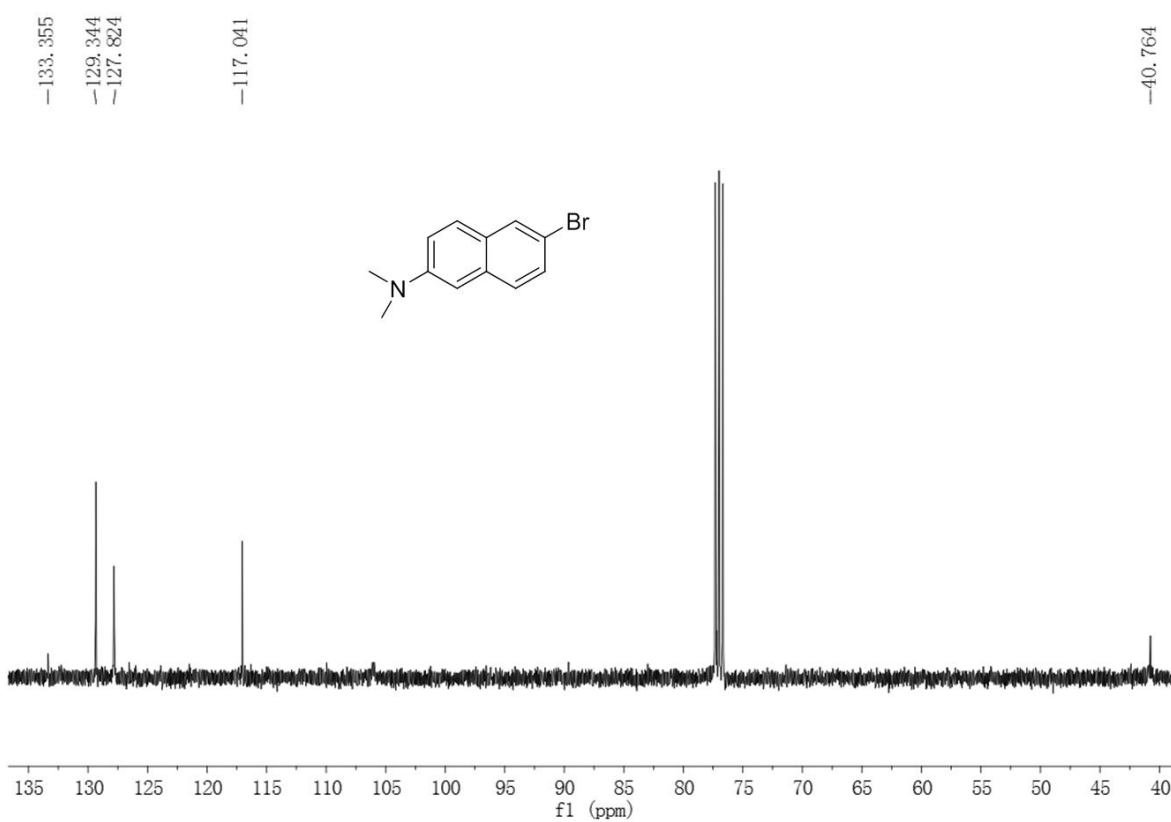

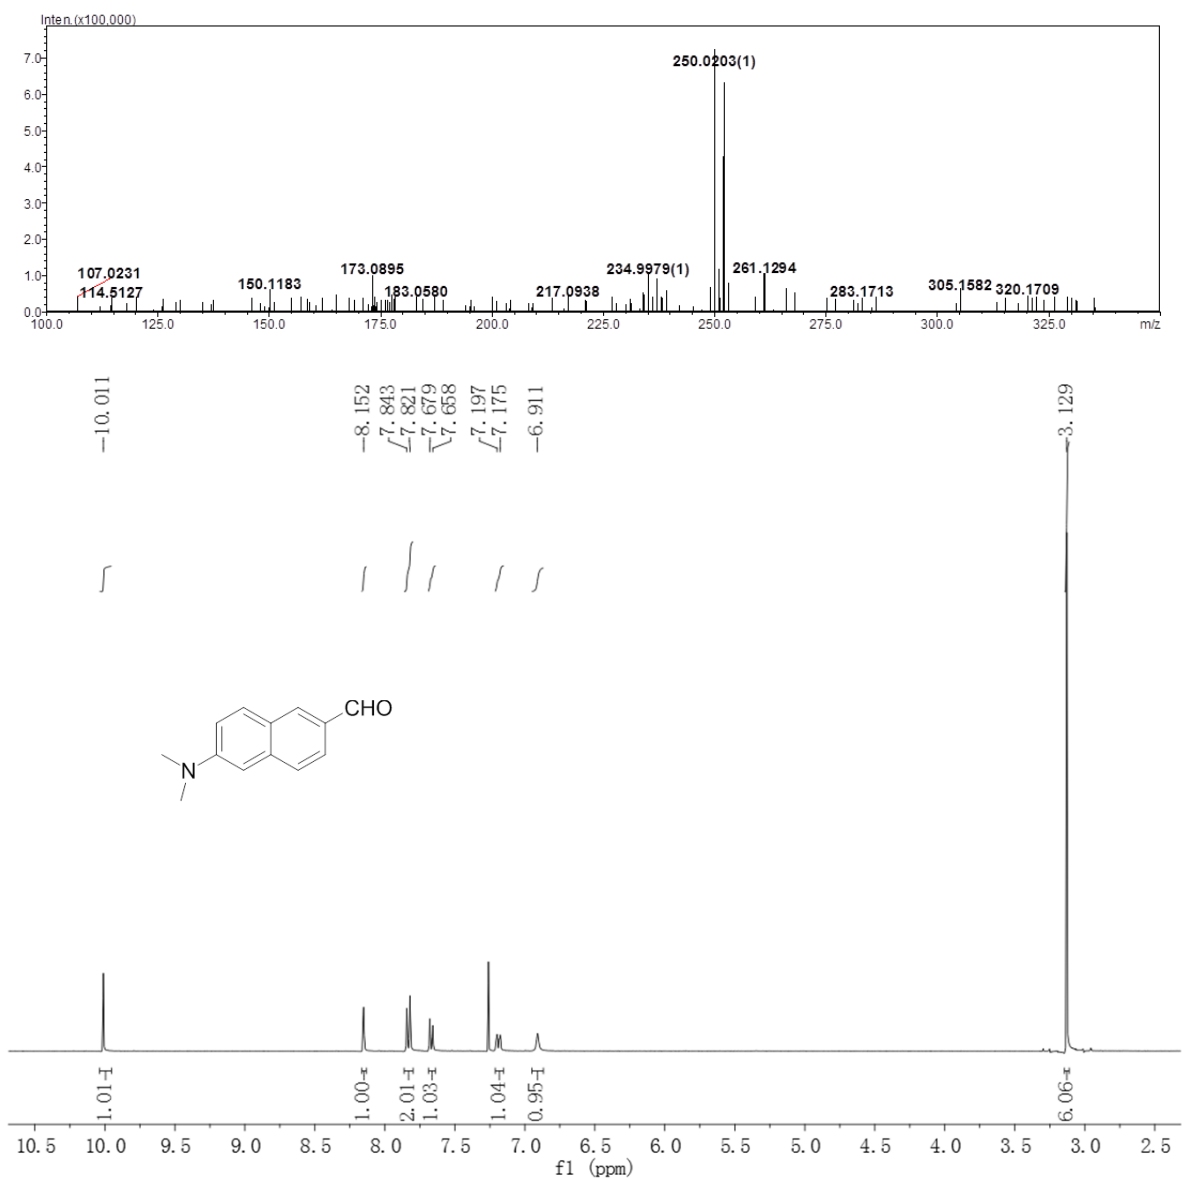

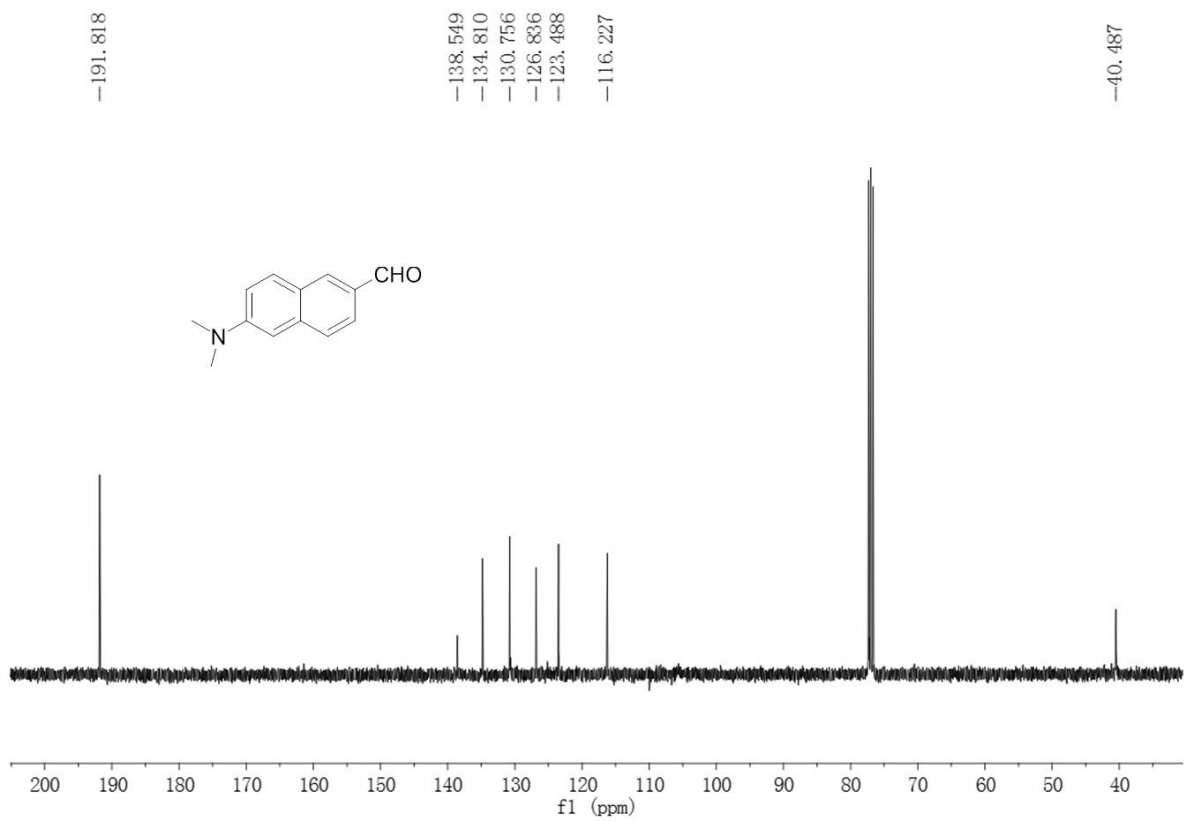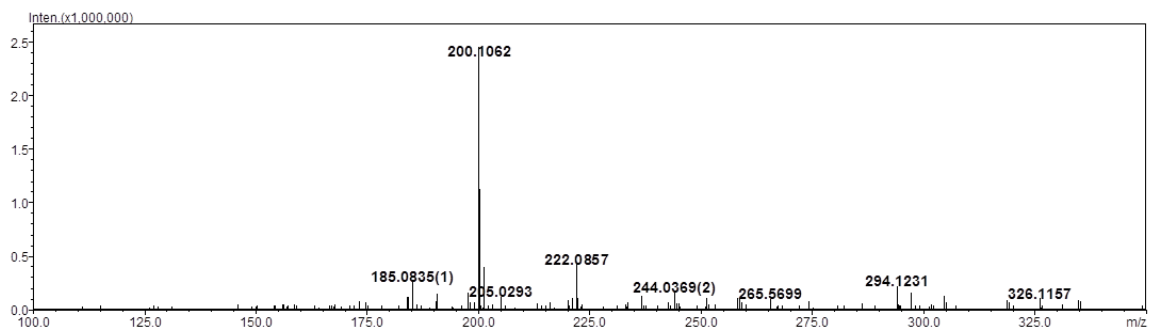

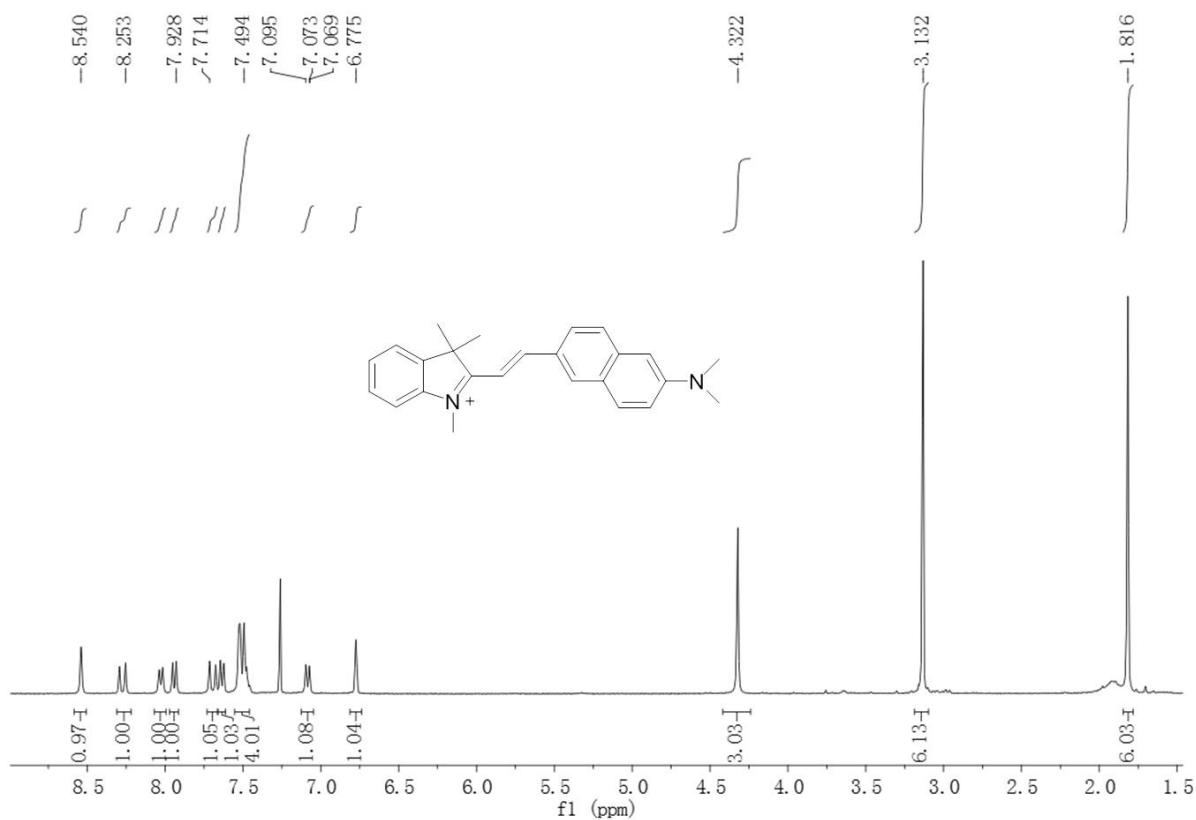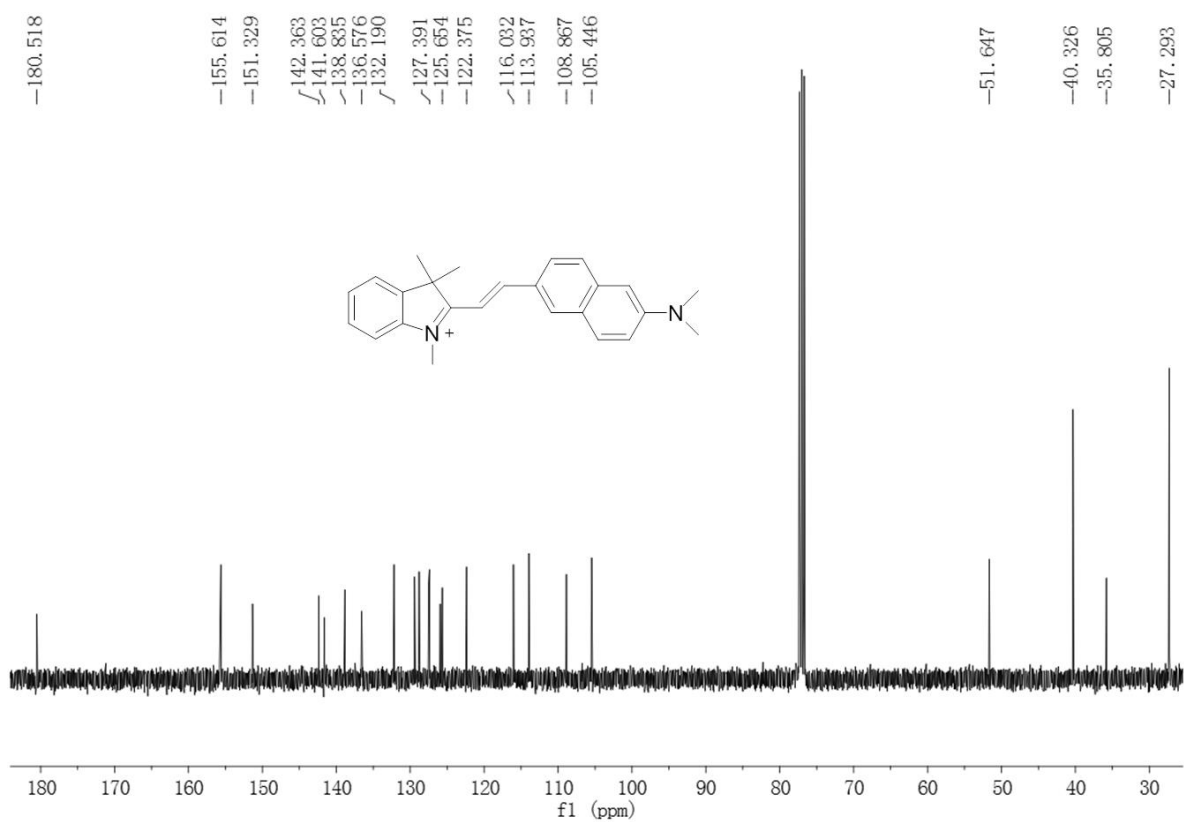

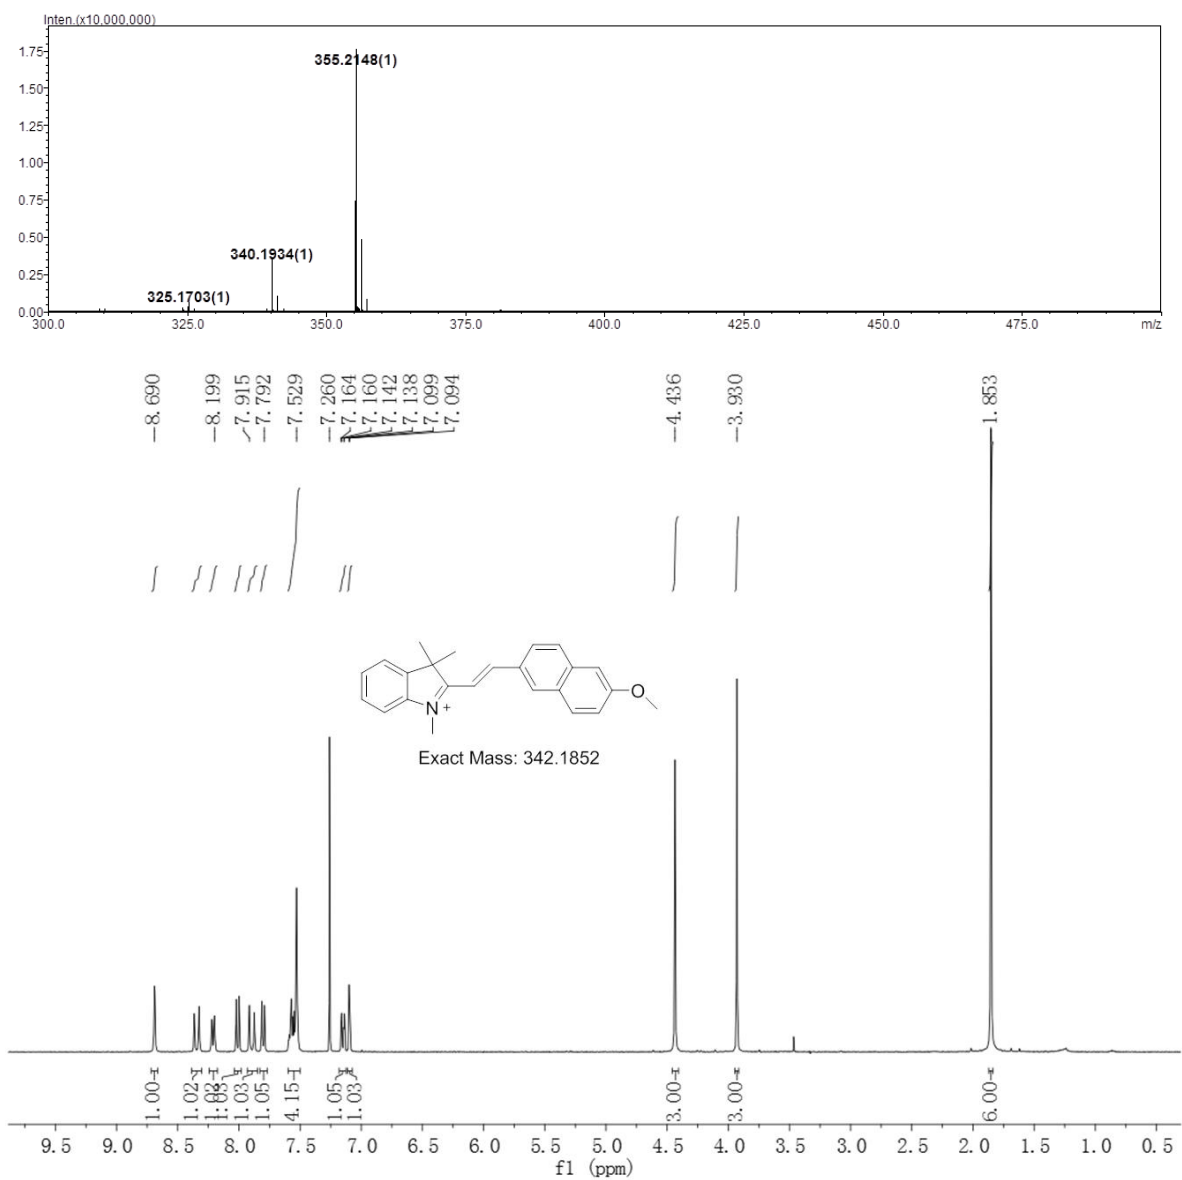



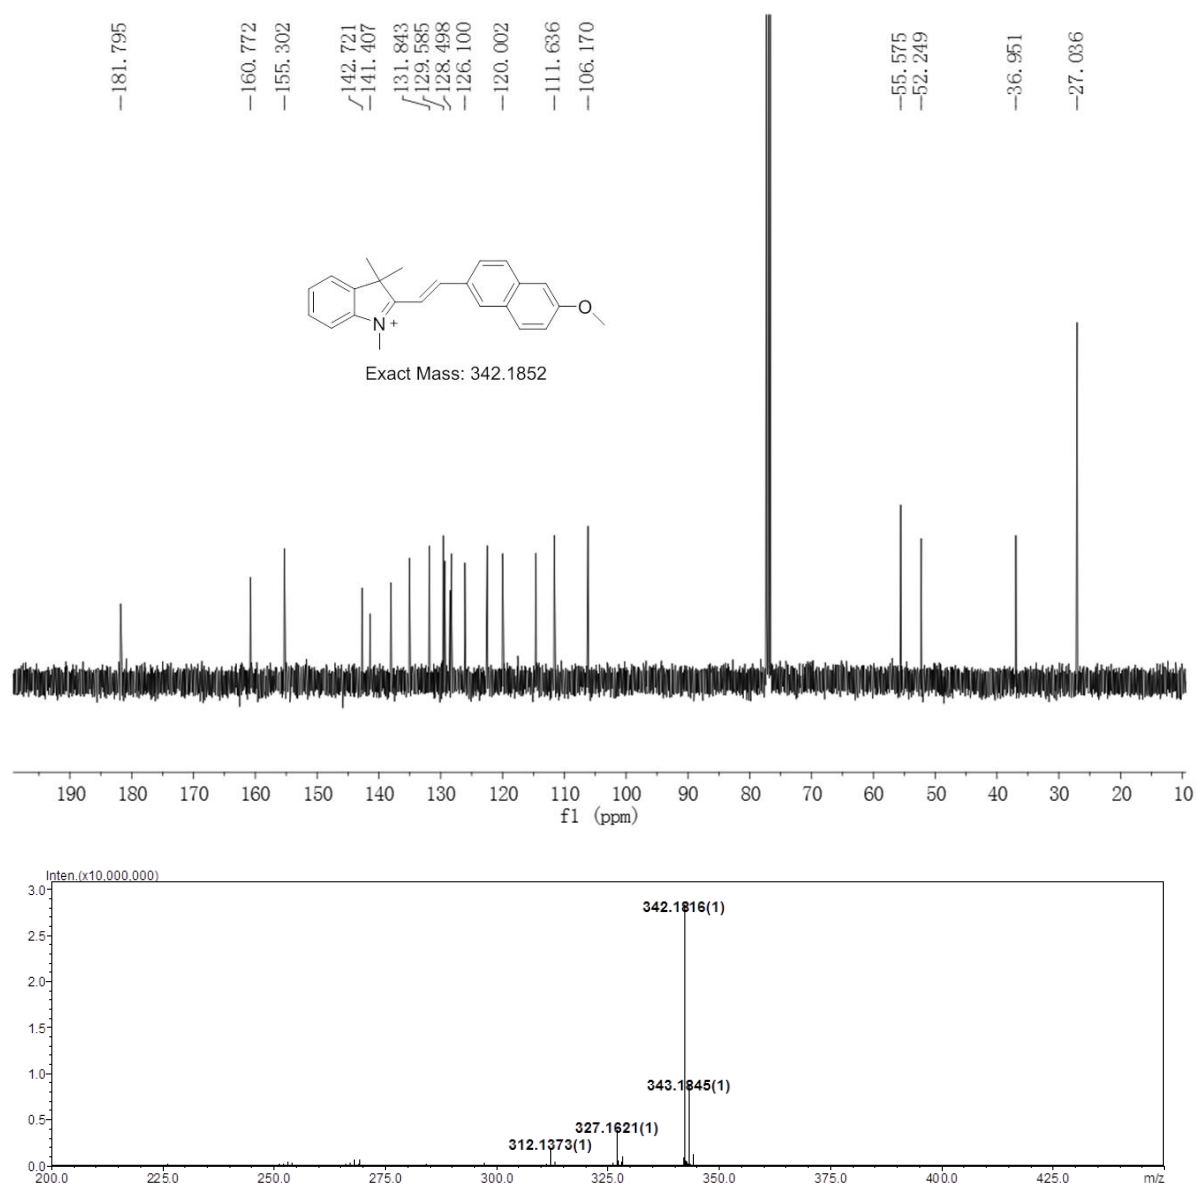

3. Figure S1  $^1\text{H}$ NMR,  $^{13}\text{C}$ NMR and HRMS of compounds

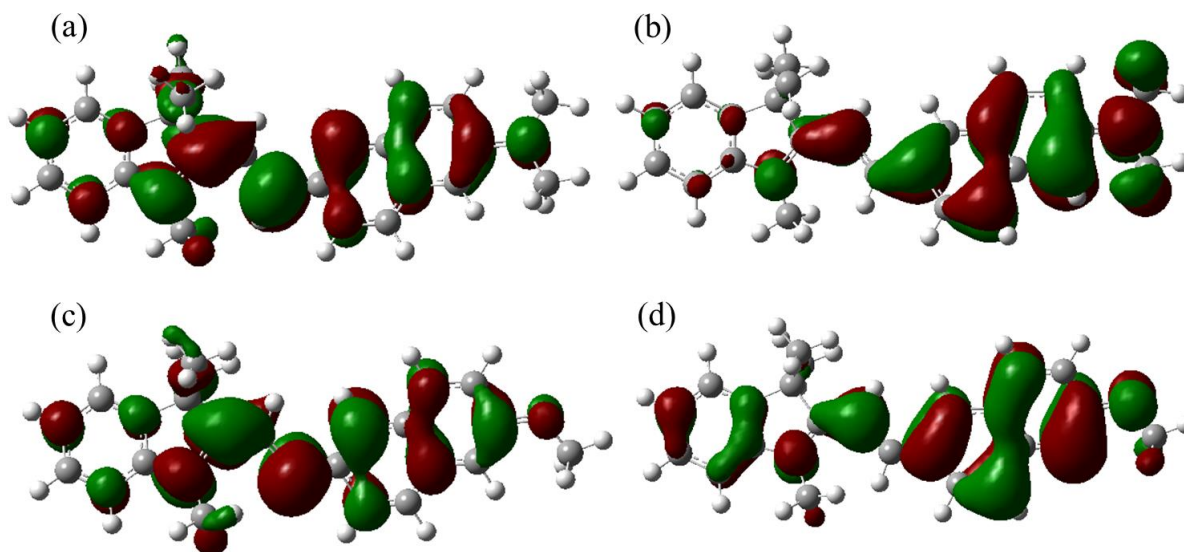

**4. Figure S2** HOMO and LUMO energy level of **rTPONOO-1** and **rTPONOO-2** (a) LUMO orbital of **rTPONOO-1** (b) HOMO orbital of **rTPONOO-1** (c) LUMO orbital of **rTPONOO-2** (d) HOMO orbital of **rTPONOO-2**

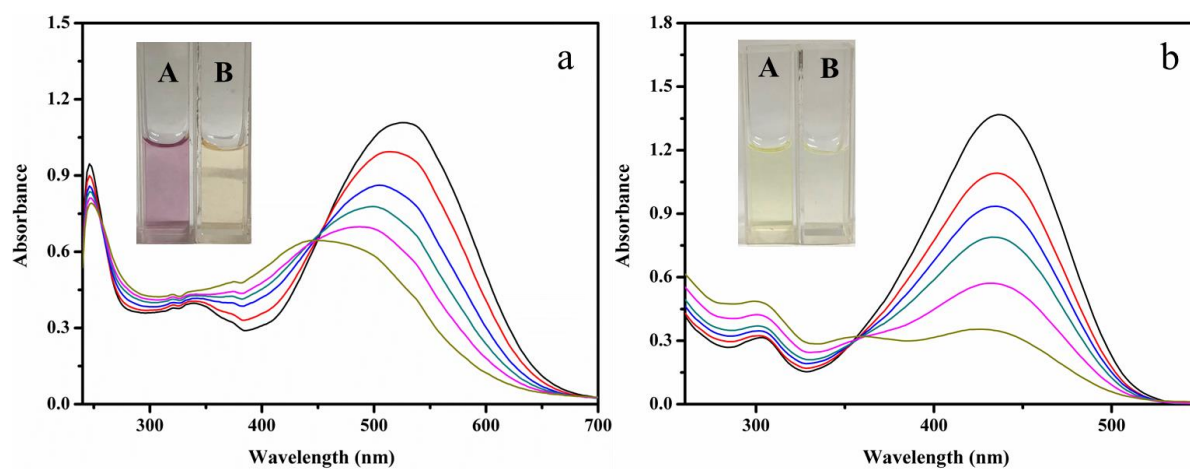

**5. Figure S3** The absorption spectra of **rTPONOO-1** (10  $\mu$ M) and **rTPONOO-2** (10  $\mu$ M) with addition of different concentrations of  $\text{ONOO}^-$  (0, 10  $\mu$ M, 20  $\mu$ M, 30  $\mu$ M, 40  $\mu$ M, 50  $\mu$ M) in PBS buffer solution containing 1% DMF (50 mM, pH = 7.4) (a) **rTPONOO-1** (b) **rTPONOO-2**. Inset: images of **rTPONOO-1** (10  $\mu$ M) or **rTPONOO-2** (10  $\mu$ M) in the absence (A) and presence (B) of  $\text{ONOO}^-$ .

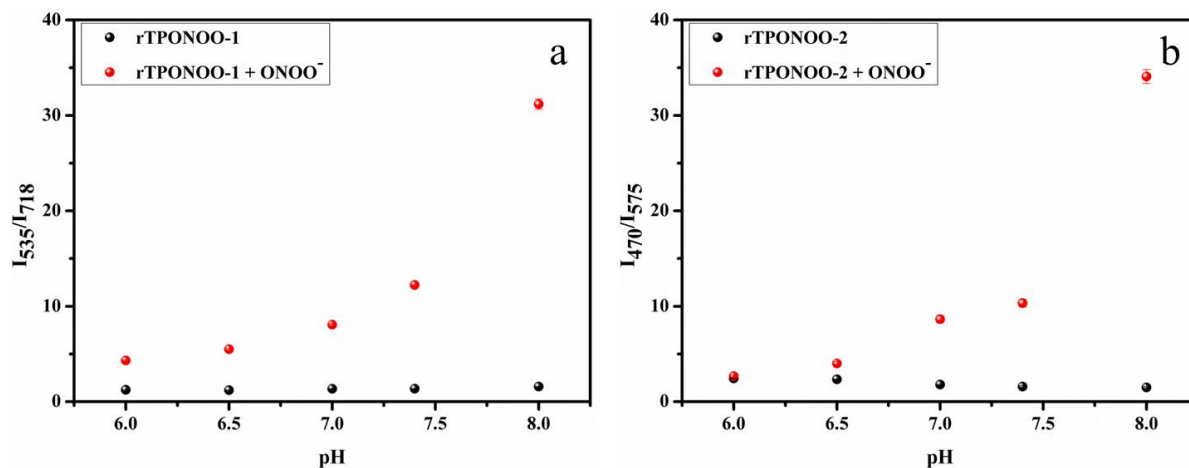

**6. Figure S4** . The effects of pH on the fluorescence of **rTPONOO-1** (5  $\mu$ M) and **rTPONOO-2** (5  $\mu$ M) before and after addition of ONOO<sup>-</sup> (50  $\mu$ M) in PBS buffer solution containing 1% DMF (50 mM, pH = 7.4 ) . (a) **rTPONOO-1** (b) **rTPONOO-2**.

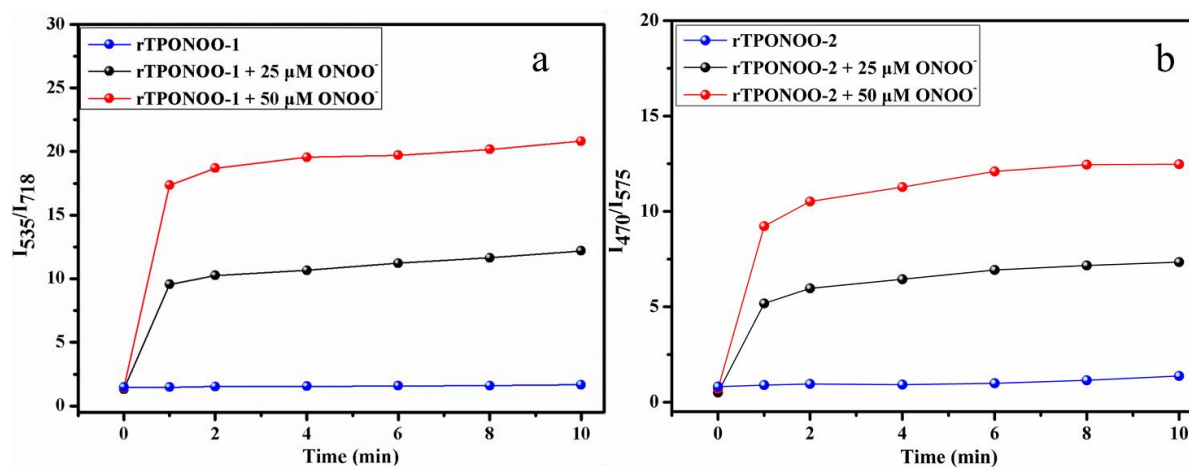

**7. Figure S5** . The reaction time of **rTPONOO-1** (5  $\mu$ M) and **rTPONOO-2** (5  $\mu$ M) toward different concentrations of ONOO<sup>-</sup> in PBS buffer solution containing 1% DMF (50 mM, pH = 7.4 ) . (a) **rTPONOO-1** (b) **rTPONOO-2**.

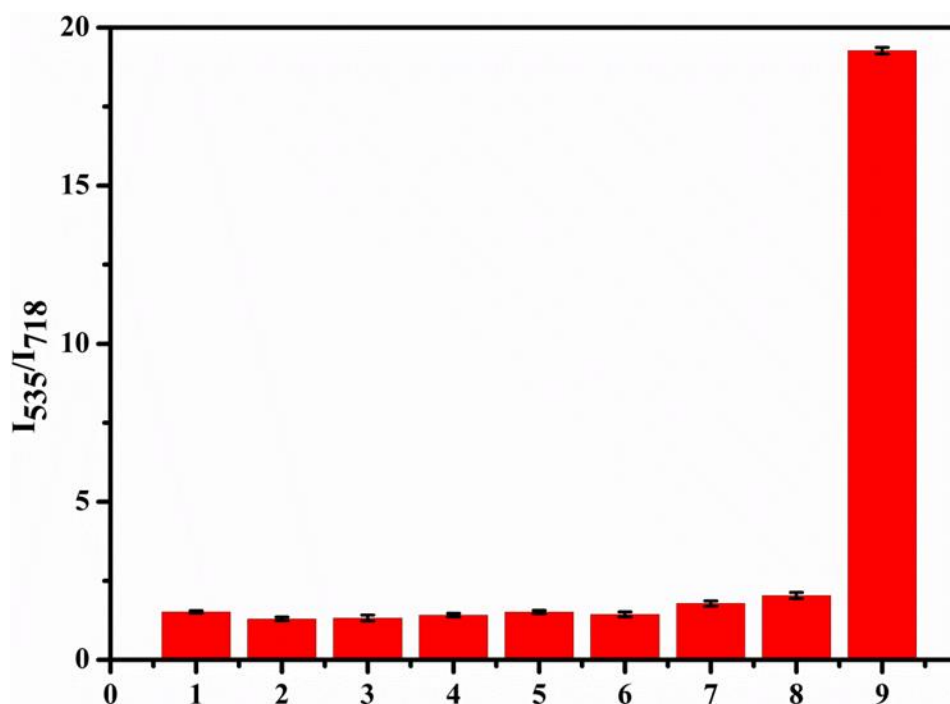

**8. Figure S6** . The fluorescence ratio ( $I_{535}/I_{718}$ ) of **rTPONOO-1** (5  $\mu\text{M}$ ) in the presence of  $\text{ONOO}^-$  (50  $\mu\text{M}$ ) and biologically relevant analytes (100  $\mu\text{M}$ ) [1, **rTPONOO-1**; 2,  $\text{Na}^+$ ; 3,  $\text{K}^+$ ; 4,  $\text{Ca}^{2+}$ ; 5,  $\text{Mg}^{2+}$ ; 6,  $\text{Zn}^{2+}$ ; 7,  $\text{Al}^{3+}$ ; 8,  $\text{Fe}^{3+}$ ; 9,  $\text{ONOO}^-$ ] in PBS buffer solution containing 1% DMF (50 mM, pH = 7.4). ( $\lambda_{\text{ex}}$  = 375 nm and  $\lambda_{\text{em}}$  = 525 nm).

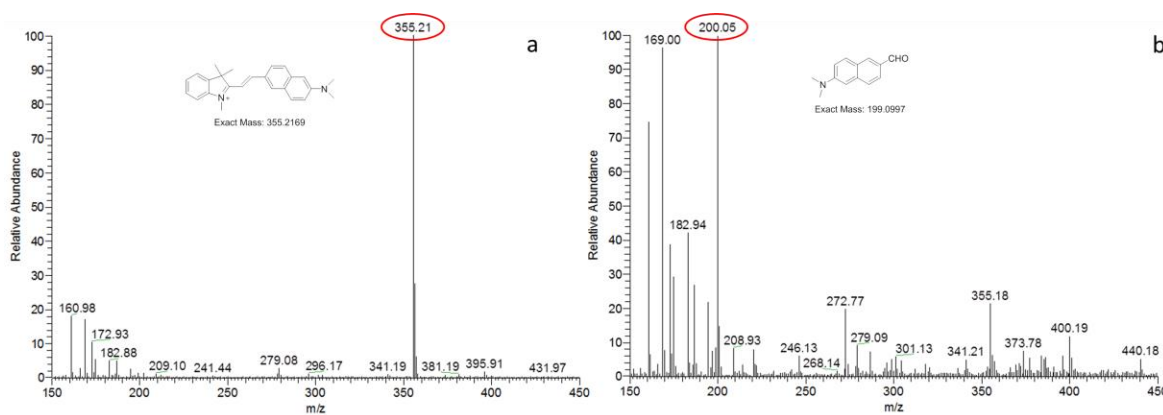

**9. Figure S7** . ESI spectra of (a) **rTPONOO-1** (b) **rTPONOO-1** upon addition of  $\text{ONOO}^-$ .

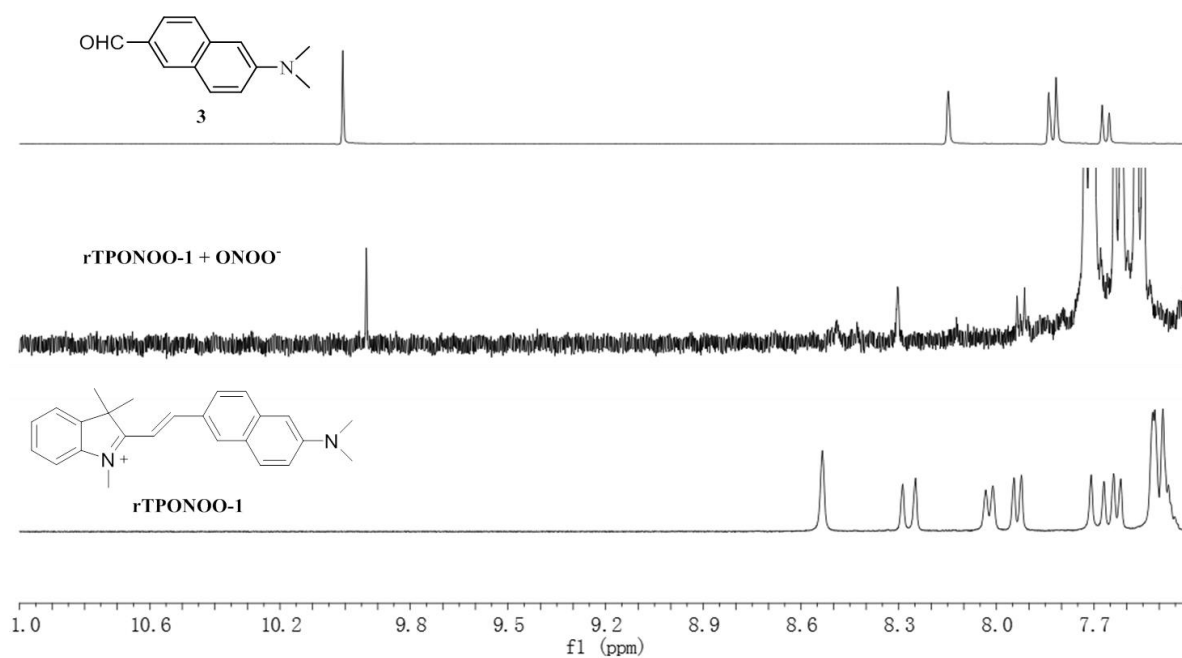

**10. Figure S8** . The NMR titration analysis of the mixture of **rTPONOO-1** and  $\text{ONOO}^-$  in  $\text{DMSO-}d_6$ .

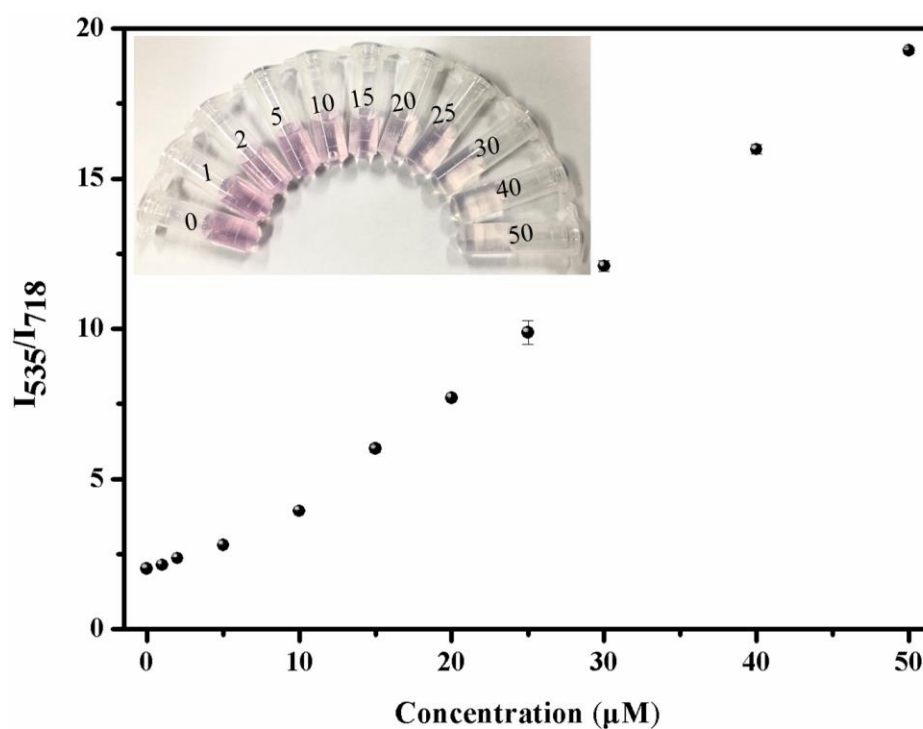

**11. Figure S9** . The fluorescence ratio ( $I_{535}/I_{718}$ ) of **rTPONOO-1** ( $5 \mu\text{M}$ ) in the different concentrations of  $\text{ONOO}^-$  (0 –  $50 \mu\text{M}$ ). Inset: images of **rTPONOO-1** ( $5 \mu\text{M}$ ) in the different concentrations of  $\text{ONOO}^-$  (0 –  $50 \mu\text{M}$ ).

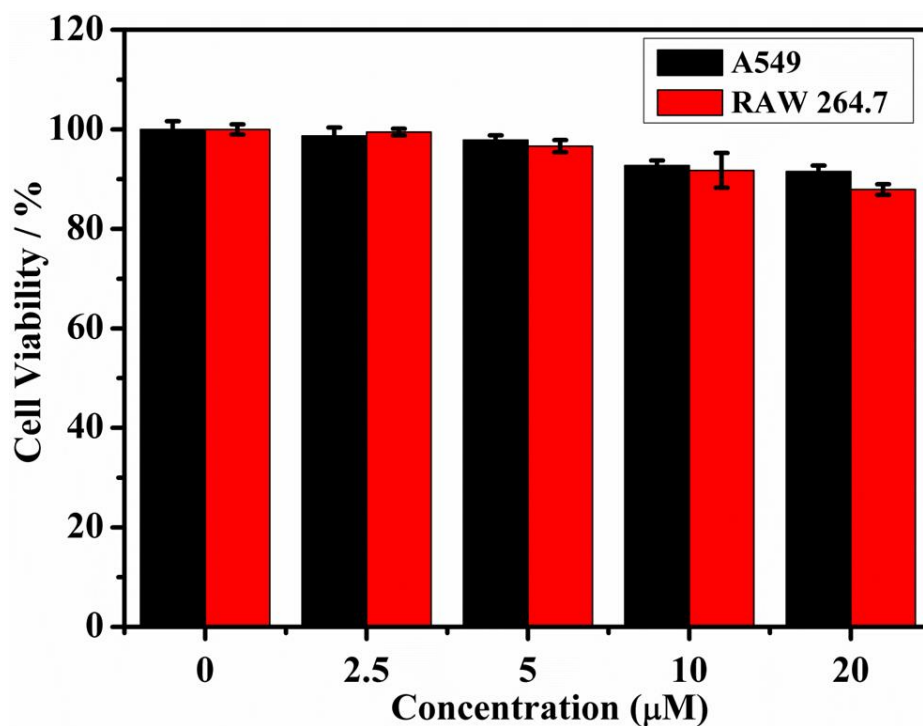

**12. Figure S10** . Cell viability of A549 and RAW 264.7 treated with different concentrations of rTPONOO-1.

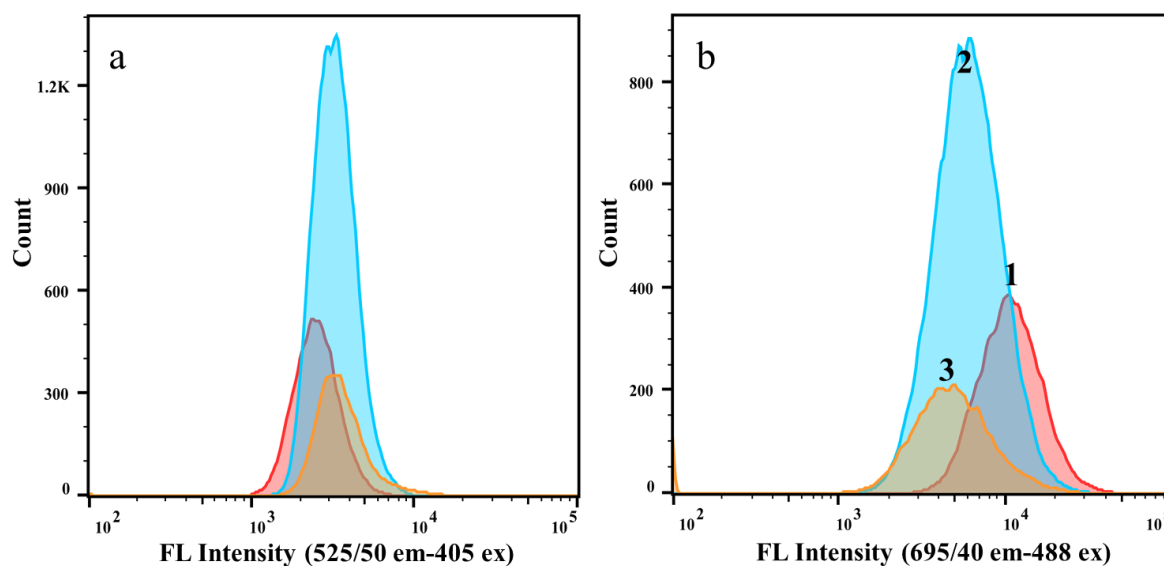

**13. Figure S11** . Detecting exogenous ONOO<sup>-</sup> in A549 cells treated with (red line) rTPONOO-1 (10 μM) for 30 min; (blue line) rTPONOO-1 (10 μM) for 30 min and then 0.6 mM SIN-1 for another 30 min; (orange line) rTPONOO-1 (10 μM) for 30 min and then 1.2 mM SIN-1 for another 30 min. (a) The FL intensity record in 525/50 nm,  $\lambda_{ex}$  = 405 nm; (b) The FL intensity record in 695/40 nm,  $\lambda_{ex}$  = 488 nm.

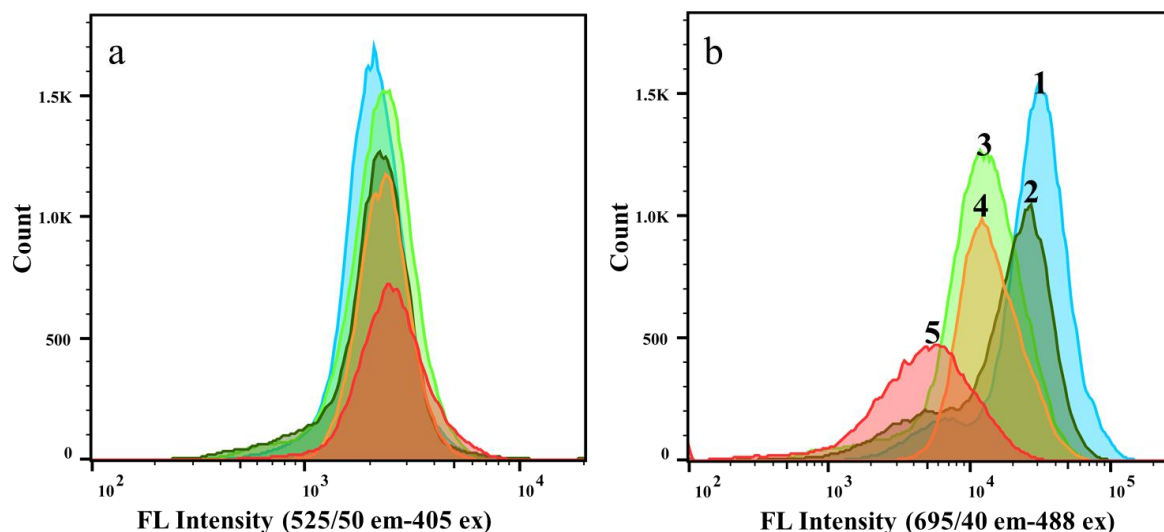

**14. Figure S12** . Detecting exogenous and endogenous  $\text{ONOO}^-$  in RAW 264.7 cells treated with (blue line) **rTPONOO-1** (10  $\mu\text{M}$ ) for 30 min; (deep green line) 0.6 mM SIN-1 for 30 min and then **rTPONOO-1** (10  $\mu\text{M}$ ) for another 30 min; (green line) 1.2 mM SIN-1 for 30 min and then **rTPONOO-1** (10  $\mu\text{M}$ ) for another 30 min; (orange line) LPS (1  $\mu\text{g}/\text{mL}$ ) and IFN- $\gamma$  (50  $\text{ng}/\text{mL}$ ) for 12 h, then **rTPONOO-1** (10  $\mu\text{M}$ ) for 30 min; (orange line) LPS (1  $\mu\text{g}/\text{mL}$ ) and IFN- $\gamma$  (50  $\text{ng}/\text{mL}$ ) and NAC (1 mM) for 12 h, then **rTPONOO-1** (10  $\mu\text{M}$ ) for 30 min. (a) The FL intensity record in 525/50 nm,  $\lambda_{\text{ex}} = 405$  nm; (b) The FL intensity record in 695/40 nm,  $\lambda_{\text{ex}} = 488$  nm.

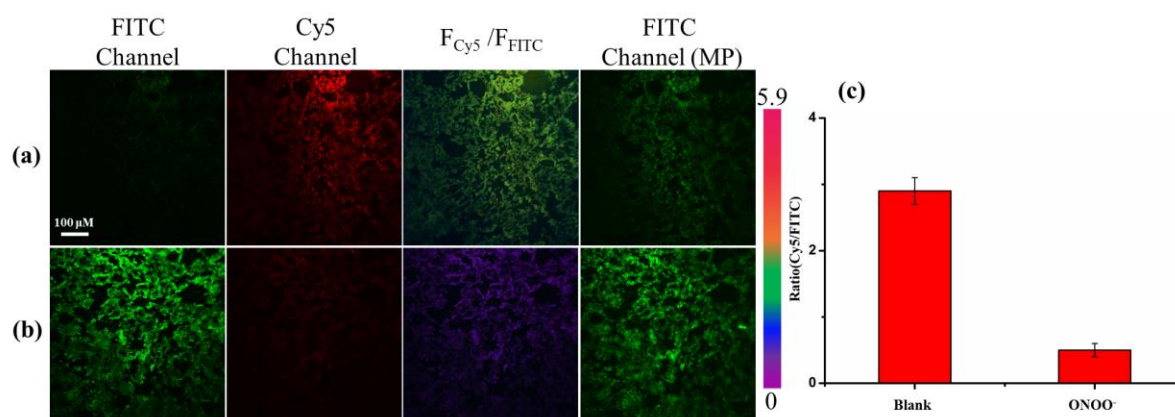

**15. Figure S13** . Fluorescence imaging of  $\text{ONOO}^-$  in frozen lung slice (a)The slice was treated with **rTPONOO-1** (20  $\mu\text{M}$ ) for 1 h; (b) The slice was treated with **rTPONOO-1** (20  $\mu\text{M}$ ) for 1 h and then 200  $\mu\text{M}$   $\text{ONOO}^-$  for another 1 h; (c) Average intensity ratios from ratio images of (a) and (b). Cy5 channel:  $\lambda_{\text{ex}} = 488$  nm; FITC channel:  $\lambda_{\text{ex}} = 405$  nm; FITC channel (MP):  $\lambda_{\text{ex}} = 800$  nm.



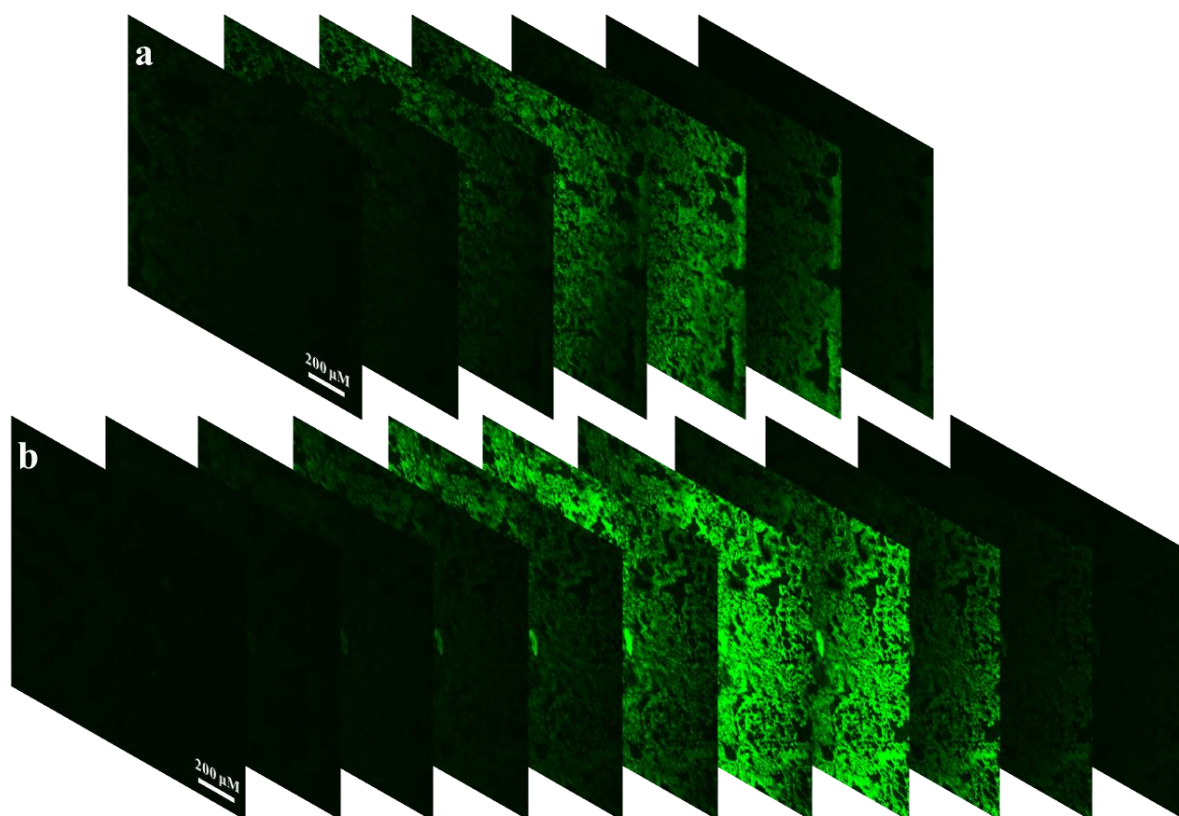

**16. Figure S14** . Images of lung slice at different depths (a) The frozen lung slice was treated with **rTPONOO-1** (20  $\mu\text{M}$ ) for 1 h, the images were captured every 10  $\mu\text{m}$  from 0 to 70  $\mu\text{m}$  (b) The frozen lung slice was treated with **rTPONOO-1** (20  $\mu\text{M}$ ) for 1 h and then 200  $\mu\text{M}$  ONOO $^-$  for another 1 h the images were captured every 10  $\mu\text{m}$  from 0 to 110  $\mu\text{m}$ .
